# Supplementary material
Source: Springer Nature journal article supplement (https://www.springermedizin.de/resource/supplementary/13063_2012_1401_MOESM2_ESM.pdf/9619954)
Supplement: MOESM2 [file 9619954]

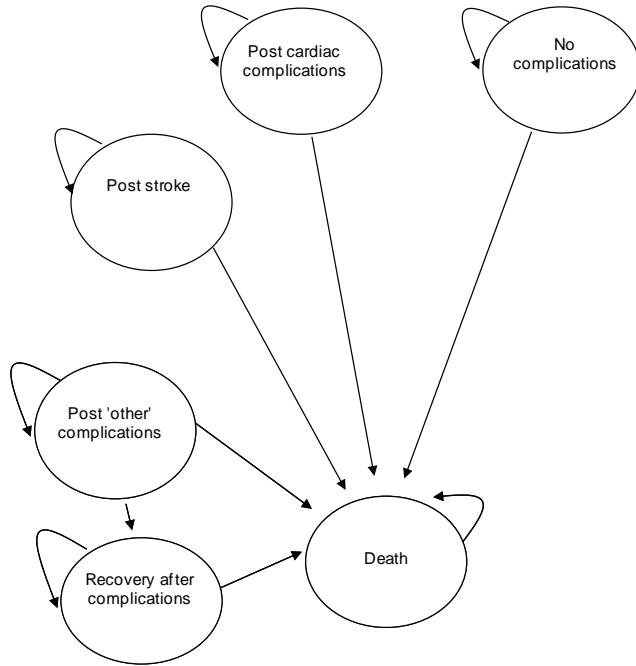

| Age   | Cycle | Standard mortality | No complication | Cardiovascular complication | Cerebrovascular complication | Other complications | Recovery after other complications | Mortality | Check | Costs | Discounted cost | Discounted QALY | Discounted QALY |
|-------|-------|--------------------|-----------------|-----------------------------|------------------------------|---------------------|------------------------------------|-----------|-------|-------|-----------------|-----------------|-----------------|
| 75.00 | 0     |                    | 0.44            | 0.06                        | 0.0012                       | 0.35                | 0.00                               | 0.15      | 1.00  | 0     | 0               | 0.56            | 0.56            |
| 76.00 | 1     | 0.06004            | 0.42            | 0.05                        | 0.0009                       | 0.12                | 0.14                               | 0.26      | 1.00  | 4346  | 3140            | 0.98            | 0.70            |
| 77.00 | 2     | 0.065085           | 0.39            | 0.05                        | 0.0009                       | 0.06                | 0.19                               | 0.31      | 1.00  | 1067  | 748             | 1.69            | 1.19            |
| 78.00 | 3     | 0.07387            | 0.36            | 0.04                        | 0.0008                       | 0.03                | 0.20                               | 0.36      | 1.00  | 1116  | 760             | 2.41            | 1.64            |
| 79.00 | 4     | 0.083035           | 0.33            | 0.04                        | 0.0007                       | 0.02                | 0.20                               | 0.41      | 1.00  | 1090  | 721             | 3.12            | 2.06            |
| 80.00 | 5     | 0.094555           | 0.30            | 0.04                        | 0.0007                       | 0.01                | 0.18                               | 0.47      | 1.00  | 1020  | 655             | 3.84            | 2.46            |

Appendix 2. The calculated probabilities of survival and mortality following the postoperative complications are illustrated for the routine fluid for five years. Each arrow represents a pathway and the pathways are characterized with probabilities. Each pathway is associated with costs and quality of life weights. The costs and quality of life weights of each pathway are weighted by the corresponding pathway probabilities. The sum of these weighted costs yields the expected cost during the first year and the weighted quality of life index multiplied by one year yields the expected quality adjusted life year (QALY). The cycles are repeated five times and the aggregated costs and QALYs are calculated. The same calculation is done for the GDHT.
